1 **Title**

2 Gene duplication accelerates the pace of protein gain and loss from plant organelles.

3 **Authors**

4 Rona Costello, David M. Emms, Steven Kelly

5 **Affiliations**

6 Department of Plant Sciences, University of Oxford, South Parks Road, OX1 3RB, UK

7 **Corresponding Author**

8 Name: Steven Kelly

9 Email: [steven.kelly@plants.ox.ac.uk](mailto:steven.kelly@plants.ox.ac.uk)

10 Telephone: +44 (0)1865 275123

11 Address: Department of Plant Sciences, University of Oxford, South Parks Road, Oxford, OX1 3RB, UK

12 **Keywords**

13 Evolution; organelle; plant; proteome; protein; targeting; duplication; localisation

14 **Introductory paragraph**

15 A hallmark of eukaryotic cells is the compartmentalisation of intracellular processes into specialised  
16 membrane-bound compartments known as organelles. Plant cells contain several such organelles  
17 including the nucleus, chloroplast, mitochondrion, peroxisome, golgi, endoplasmic reticulum and  
18 vacuole. Organelle biogenesis and function is dependent on the concerted action of numerous nuclear-  
19 encoded proteins which must be imported from the cytosol (or endoplasmic reticulum) where they are  
20 made. Using phylogenomic approaches coupled to ancestral state estimation we show that the rate of  
21 change in plant organellar proteome content is proportional to the rate of molecular sequence evolution  
22 such that the proteomes of chloroplasts and mitochondria lose or gain ~3.2 proteins per million years.  
23 We show that these changes in protein targeting have predominantly occurred in genes with regulatory

24 rather than metabolic functions, and thus altered regulatory capacity rather than metabolic function has  
25 been the major theme of plant organellar evolution. Finally we show gain and loss of protein targeting  
26 occurs at a higher rate following gene duplication events, revealing that gene and genome duplication  
27 are a key facilitator of organelle evolution.

## 28 ***Main text***

29 While the chloroplast and mitochondrion contain DNA that encodes a number of organellar intrinsic  
30 proteins, the vast majority of chloroplast and mitochondrial proteins are encoded in the nucleus <sup>1</sup>.  
31 Moreover, the proteome of the secretory organelles, peroxisome and vacuole is entirely encoded in the  
32 nuclear genome. Nuclear-encoded organellar proteins are translocated to and across the organelle  
33 membrane by means of a short, often cleavable, targeting signal located within the amino acid sequence  
34 of the protein <sup>2</sup>. Although these target signals come in a variety of forms, the targeting sequences for  
35 chloroplasts, mitochondria and the secretory organelles are usually located at the N-terminus of a  
36 polypeptide chain and cleaved upon entry into the organelle <sup>3</sup>. Thus, the sequences of these targeting  
37 signals once removed have no impact on the function of the mature protein. In addition, there is  
38 substantial flexibility in the sequence and length of targeting peptides <sup>4</sup> such that a large diversity of  
39 sequences can function to target proteins to their intended destination.

40 From early in the investigation of the protein content of organelles it was noted that many proteins had  
41 different isoforms with divergent subcellular localisations. For example, the cytosolic and mitochondrial  
42 isoforms of phosphoenolpyruvate carboxykinase proteins in animals <sup>5</sup>, or the cytosolic and chloroplastic  
43 isoforms of sugar phosphate enzymes in plants <sup>6</sup>. Following the advent of protein, cDNA and genome  
44 sequence data it was realised that disparate organellar localisation within protein families could be  
45 facilitated by differences in the presence and absence of N-terminal target signals and has in fact been  
46 found to occur among many paralogous proteins <sup>7-11</sup>. In addition to these, a bioinformatic analysis of  
47 Arabidopsis gene families identified 239 families that contained two or more members with different  
48 predicted subcellular localisations, suggesting that changes in protein targeting may be a common

49 occurrence in evolution <sup>12</sup>. However, when or how often such changes occur during evolution is  
50 unknown.

51 To address this knowledge gap in plants, prediction of subcellular targeting motifs was carried out for  
52 the complete set of proteins from a representative set of 42 plant genomes available in the Phytozome  
53 database <sup>13</sup>. The size of the chloroplast, mitochondrion, secretory and peroxisomal proteome for each  
54 species was subsequently inferred (Fig.1, Supplemental File S1). Among angiosperms there was little  
55 variation in the proportion of the proteome predicted to be targeted to each subcellular compartment  
56 while the early diverging land plants and green algae exhibited more variation. On average in land plants  
57 the size of the predicted chloroplast, mitochondrion, secretory and peroxisome proteomes comprised  
58 14% ( $\pm 2\%$ ), 14% ( $\pm 3\%$ ), 17% ( $\pm 2\%$ ) and 0.32% ( $\pm 0.05\%$ ) of the total proteome, respectively (Fig.1,  
59 Supplemental File S1 ). Predicted proteome sizes are likely to be over- or under- estimates depending  
60 on the sensitivity and specificity of TargetP, PredAlgo and PTS prediction (see <sup>14,15</sup>). Irrespective of this  
61 however, these results suggest that the proportion of all proteins that are targeted to organelles has  
62 remained stable throughout plant evolution.

63 To identify occurrences of protein target signal gain and loss during the evolution of plants we inferred  
64 a complete set of species-tree reconciled gene trees (n = 18,823) for all orthogroups (gene families) of  
65 this 42 species dataset. Ancestral state estimation was then performed to predict the subcellular  
66 targeting of the ancestral proteins represented by each internal branch of each reconciled gene tree.  
67 Evolutionary changes in protein targeting were identified in this data and mapped to the corresponding  
68 branch of the species tree to infer the number of protein gains and losses that occurred to each organelle  
69 along each branch of the species tree. In total, across the four organelles, 6162 gains and 9058 losses  
70 were identified and mapped to internal branches of the species tree. Gains and losses in protein  
71 targeting were observed along every branch of the species tree, with some branches being associated  
72 with more change than others (Fig. 2). Incorrect or missing prediction of organelle proteins are a  
73 potential source of error in this analysis. To account for this, only changes in protein localisation which  
74 have been retained in a high percentage of descendant proteins were selected for this and further

75 analysis (see Methods). This filtration step was included to reduce false positive inference of subcellular  
76 localisation change, at the expense of missing some true changes in protein localisation.

77 To investigate the rate at which gains and losses in subcellular targeting have occurred during plant  
78 evolution the number of changes in subcellular targeting along each branch of the species tree was  
79 compared to the amount of molecular evolution that occurred along the same branch. Here the amino  
80 acid substitution rate per site was taken as a proxy for molecular evolution rate. There was a positive  
81 linear correlation between sequence evolutionary rate and the number of changes in localisation to all  
82 subcellular compartments (Fig. 3a-d). Thus, the rate of subcellular targeting evolution is proportional to  
83 the rate of molecular evolution and therefore organellar protein content diversifies in proportion to  
84 evolutionary distance.

85 While the number of gains along the branches of the species tree was correlated with the number of  
86 losses, there was a higher rate of loss in subcellular targeting to each of the four organelles during the  
87 evolution of the species in this study (Supplemental Figure, S1). A similar phenomenon was also  
88 observed for the gains and losses of signal peptides during the evolution of *Enterobacterales*<sup>16</sup>. This  
89 observation is compatible with the general genetic phenomenon that it is easier to evolve loss-of-  
90 function than gain-of-function and thus mirrors studies that have looked at gene or trait gain and loss.  
91 Assuming plants colonised the land ~450 million years ago we can estimate that, at a minimum, 3.2,  
92 3.3, 2.2 and 0.21 changes in protein targeting to the chloroplast, mitochondrion, secretory pathway and  
93 peroxisome occur for every million years of land plant evolution, respectively (Supplemental File S2).

94 To shed light on the functional significance of these changes in protein targeting, a functional term  
95 enrichment analysis was conducted on the set of genes whose localisation changed during plant  
96 evolution. For both the chloroplast and the mitochondrion the set of genes that changed localisation  
97 during evolution (when compared to the complete set of proteins predicted to be localised to that  
98 organelle) were found to be enriched for functional terms concerning regulation, both at a transcriptional  
99 and post-transcriptional level (Fig. 4). There was also an overrepresentation of functional terms  
100 concerning hormone production, secondary metabolism, stress, transport and development

101 (Supplemental File S3), with few terms related to energy metabolism. In support of this observation,  
102 among proteins gained and lost to the chloroplast there was also an over-representation of proteins that  
103 localise to the nucleoid, with no statistical over-representation of proteins that localise to other chloroplast  
104 sub-compartments such as thylakoid, envelope, or stroma (Supplemental File S4). Thus, it appears that  
105 altered regulatory capacity has been the most frequent target of change during the evolution of  
106 chloroplasts and mitochondria in land plants.

107 Consistent with the lack of genetic material, functional terms associated with transcriptional regulatory  
108 processes were not observed for either the peroxisome or secretory pathway (Supplemental File S3).  
109 Instead, enriched functional terms for peroxisomal proteins were associated with metabolism (amino  
110 acid, lipid, secondary) or gluconeogenesis while the secretory system were associated with protein post-  
111 translational modification, signalling and the cell wall (Supplemental File S3). It was noteworthy that  
112 there were a larger number of enriched functional terms for proteins gained or lost to the secretory  
113 pathway than any other organelle, consequently there was also a higher diversity of functional classes  
114 of genes compared to those localised to the chloroplast or mitochondrion (Supplemental File S3).

115 It has been previously hypothesized that changes in protein localization following gene duplication may  
116 be an important mechanism of duplicate gene neofunctionalisation<sup>7,17-19</sup>. If these hypotheses are  
117 correct, it might be expected that changes in protein targeting would evolve more frequently following  
118 gene duplication events. To test this, the association between gene duplication events and protein  
119 relocalisation events in this data-set was investigated (see Methods). The 18,823 orthogroup trees in  
120 this study were analyzed to identify highly-supported, non-terminal gene duplication and speciation  
121 nodes. In total 20,137 such duplication nodes were identified and of those 1117 (5.6%) had a child node  
122 on which the localization of the protein changed. This frequency was significantly higher than that  
123 observed for speciation nodes in the same gene trees (3.9%,  $p < 0.01$ ). This phenomenon is observed  
124 whether the dataset is analyzed as a whole or whether individual locations are analyzed individually  
125 (Fig. 3e-h). The one exception to this was the loss of protein targeting to the mitochondrion, which was  
126 not significantly higher following gene duplication (Fig. 3f,  $p = 0.11$ ). Thus, overall the frequency of

127 evolving a change in subcellular localization is higher following gene duplication suggesting that gene  
128 and genome duplication may accelerate the pace of organelle proteome evolution.

129 This study has provided new insight into the dynamics of organellar proteome evolution in plants. It has  
130 demonstrated that there has been continuous change in predicted organellar proteomes since plants  
131 colonized the land ~450 million years ago. Furthermore, it has revealed that the evolutionary history of  
132 the chloroplast and mitochondrion in land plants has primarily been a story of altered regulatory capacity,  
133 with the majority of changes occurring to proteins with post-translational or post-transcriptional  
134 regulatory functions. The study revealed that the change in organellar proteome content is proportional  
135 to the rate of molecular sequence evolution such that plants have gained or lost ~3.2 proteins per million  
136 for both the chloroplast and mitochondrion. Finally the study provides evidence that gene duplication  
137 leads to enhanced rates of gain and loss of organellar targeting revealing a key role for these events in  
138 the evolution of plant organelles.

139 ***Figure legends:***

140 **Figure 1.** Predicted organelle proteome sizes for each species given as a percentage of the total  
141 proteome size of that species. Proteins with both a peroxisomal targeting signal and another predicted  
142 target signal (TargetP) were assigned as dual-localised peroxisomal proteins (n = 2973).

143 **Figure 2.** The number of gains (green) and losses (orange) in protein targeting to the chloroplast,  
144 mitochondrion, secretory pathway, and peroxisome along each nonterminal branch during the evolution  
145 of the species in the study. Note that branch lengths do not correspond to evolutionary distance.

146 **Figure 3.** The relationship between evolutionary rate and organellar proteome evolution. There was a  
147 positive relationship between species tree branch length (amino acid substitutions per site) and the  
148 number of gains or losses in **a**) the chloroplast ( $R^2 = 0.59, 0.49$ ), **b**) the mitochondrion ( $R^2 = 0.50, 0.42$ ),  
149 **c**) the secretory pathway ( $R^2 = 0.40, 0.50$ ). All correlations  $p < 0.001$ . **d**) fewer gains and losses were  
150 observed in peroxisomal targeting, with some branches being associated with no peroxisomal changes,  
151 the data is shown but no statistical conclusions drawn. The difference in rates of change in organellar

152 targeting following speciation or gene duplication events in **e)** the chloroplast, **f)** the mitochondrion, **g)**  
153 the secretory pathway, **h)** the peroxisome. \* indicates significant difference  $p < 0.01$ .

154 **Figure 4.** Enriched functional terms (GOMapMan) for the set of proteins that gained or lost a chloroplast  
155 or mitochondrial transit peptides during the evolution of the 42 plant species. The top 15 terms are  
156 shown for display purposes and the full dataset is available in Supplemental File S3. The proportion plot  
157 next to the bar plot indicates the percentage representation of top level functional categories  
158 encompassed by the full set of enriched functional terms.

### 159 ***Supplemental File legends***

160 **Supplemental Figure S1.** PDF. The ratio of gains to losses for each organelle for each branch in the  
161 species tree. Probability density functions were inferred using the density function in R.

162 **Supplementary File S1.** Microsoft Excel spreadsheet. Sheet 1 (Proteome Sizes) contains the number  
163 of genes that encode proteins predicted to be targeted to each subcellular compartment for each  
164 species. Sheet 2 (Land Plants Only) contains only data for land plants.

165 **Supplementary File S2.** Microsoft Excel spreadsheet. Estimation of time calibrated rate of gain and  
166 loss. Sheet 1 (Gains and losses (species tree)) contains the number of gains and losses mapped to  
167 each node in the species tree for each subcellular compartment. Sheet 2 (Divergence times) contains  
168 the divergence time estimates and the number of changes that occurred since that time.

169 **Supplementary File S3.** Microsoft Excel spreadsheet. Enrichment testing results. There are separate  
170 sheets for gains, losses and both combined for each of the subcellular compartments. There are also  
171 summary sheets (\*\_top\_level\_terms) that contain all of the top level terms for all significantly enriched  
172 MAPMAN categories in each \*\_relocalisations sheets. These summary sheets provide the data for the  
173 bar plot in main text Figure 4.

174 **Supplementary File S4.** Microsoft Excel spreadsheet. Plastid Proteome database Ontology term  
175 analysis. Sheet 1 (Ontology\_terms) contains a hierarchical representation of the ontology terms  
176 provided in the plastid proteome database. Sheet 2 (PPDB\_data) contains all of the PPDB data  
177 downloaded on the 13<sup>th</sup> of March 2018, it is provided here for reference in the event that the database

178 is lost or updated. Sheet 3 (Orthogroup\_PPDB\_terms) contains the ontology term to orthogroup  
179 mapping used in this analysis. Orthogroups inherit an ontology term if they contain a gene which has  
180 that ontology term.

## 181 ***Acknowledgements***

182 RC is supported by a BBSRC studentship through BB/J014427/1. SK is a Royal Society University  
183 Research Fellow. Work in SK's lab is supported by the European Union's Horizon 2020 research and  
184 innovation program under grant agreement number 637765.

## 185 ***Online Methods***

### 186 **Data availability**

187 All data used in this study has been deposited, and is freely available, at the Zenodo research data  
188 archive <https://doi.org/10.5281/zenodo.1414180>. This archive contains the full set of sequences,  
189 accession numbers, predicted localisation data, orthogroups, and PHYLOGENY reconciled gene trees for  
190 each orthogroup. The archive also contains the full information for all of the gene duplication events and  
191 change in localisation events for each orthogroup.

### 192 **Proteome data, and inference of orthogroups and gene trees**

193 The protein primary transcripts for 42 fully sequenced plant species were obtained from Phytozome v10  
194 <sup>13</sup>. Orthologous gene groups (orthogroups) were inferred using OrthoFinder <sup>20</sup> and multiple sequence  
195 alignments were inferred for each orthogroup using MAFFT-LINSI <sup>21</sup>. To minimise the contribution of  
196 gene tree inference error, gene trees were inferred using the true species tree for guidance by  
197 simultaneous gene tree-species tree reconciliation using PHYLOGENY <sup>22</sup>. PHYLOGENY was run on each  
198 orthogroup alignment individually with a user-provided species tree. The 'LG08' model was used, the  
199 maximum number of gaps allowed in an alignment column was 66%. The topology of the species tree  
200 was derived from angiosperm phylogeny working group and branch lengths were inferred from a  
201 concatenated multiple sequence alignment with the topology constrained to the this topology tree using  
202 RAxML <sup>23</sup>. All attempts to jointly infer the gene trees and species tree by analysing all the orthogroups



203 together resulted in an error ("Assertion `tr->likelihood >= currentLikelihood' failed."), hence all  
204 orthogroups were analysed individually with the species tree as input. The largest orthogroups could  
205 not be analysed directly with PHYLOG as they were too large (the largest orthogroup contained 12148  
206 genes). To allow the whole dataset to be analysed, gene trees for the largest 100 orthogroups were  
207 inferred using FastTree<sup>24</sup>. The nodes of these gene trees were mapped to the species tree using  
208 DLCpar<sup>25</sup>. The orthogroups were then split at each node corresponding to the root of the species tree,  
209 and each of these splits were analysed separately.

### 210 **Prediction of organelle proteins**

211 Of the 42 species included in this study, 37 comprise land plants and five comprise green algae. From  
212 proteome data for each species, we looked to identify the set of proteins predicted to contain a  
213 chloroplast transit peptide (cTP), mitochondrial targeting peptide (mTP), signal peptide (SP) or the  
214 peroxisomal targeting signals 1 & 2 (PTS1 & PTS2). For the land plant species cTPs, mTPs and SPs  
215 were predicted by TargetP 1.1<sup>14</sup> in plant mode with default cutoffs. For the five algal species (*O.*  
216 *lucimarinus*, *M. pusilla*, *C. subellipsoidea*, *V. carteri*, *C. reinhardtii*) this prediction was carried out with  
217 PredAlgo<sup>15</sup> using its default cutoffs. In cases where an amino acid sequence did not meet the minimum  
218 length requirement for PredAlgo prediction, the TargetP prediction was taken instead.

219 The prediction of peroxisomal proteins was carried out by searching for the canonical plant peroxisomal  
220 targeting signals 1 and 2 (PTS1 and PTS2)<sup>26</sup>. Here a protein sequence was classified as having a PTS1  
221 if it had any one of the 9 different c-terminal tripeptide sequences (SRL, SRM, SRI, ARL, ARM, PRL,  
222 SKL, SKM, AKL). Similarly, a protein sequence was classified as having a PTS2 peroxisome targeting  
223 sequence if it contained either of the two PTS2 peptide sequences (R[LI]X<sub>5</sub>HL) in the N-terminus region  
224 of the protein (residues 1 – 30).

### 225 **Ancestral character estimation of subcellular targeting**

226 Maximum-likelihood ancestral character estimation was used to identify gain and loss events in protein  
227 targeting that occurred during the evolution of the orthogroups inferred from this dataset. Considering  
228 the four types of target signal separately, the presence or absence of a predicted target sequence within

229 each protein was treated as binary trait data and the leaf nodes of orthogroup trees assigned a “1” or  
230 “0” accordingly. Ancestral character estimation was then carried out independently for each orthogroup  
231 to estimate the character state (presence/absence of a targeting sequence) of each internal node using  
232 the “ace” function in the R package ape<sup>27</sup> for discrete data and using the “all rates different” model. The  
233 model selected for ace is dependent upon the transition probabilities between the states. For binary  
234 characters either an “equal rates” model, in which the transition between states is constrained to be  
235 equal, or an “all rates different” model in which the forward and backward transition rate was allowed to  
236 vary over the tree can be used. It is unknown whether the rate at which a protein can gain or lose a  
237 target signal is equal, therefore the “all rates different” model was selected as being most appropriate  
238 for ancestral state estimation. Internal nodes in orthogroup trees with likelihood scores  $\geq 0.5$  were  
239 considered to contain a targeting sequence, while nodes with scores  $< 0.5$  were considered to lack a  
240 targeting sequence. Further processing and filtration was carried out as described below.

#### 241 **Identifying changes in the subcellular localisation of a protein during evolution**

242 The ancestral character estimation data was analyzed to identify changes in the organellar targeting of  
243 proteins in each orthogroup tree. By iterating over the internal nodes of the tree, a loss in subcellular  
244 targeting was defined as a transition from a targeted state to not-targeted state on consecutive branches,  
245 and *vice versa* for a gain. As ancestral character estimation is sensitive to prediction or gene tree error,  
246 a stringent filter was imposed such that a change in subcellular targeting was only counted if the  
247 changed state was conserved in 75% of the genes below the node on which the change occurred. For  
248 example, consider a parent node X and two child nodes Y and Z. If there was a predicted gain of a  
249 chloroplast transit peptide between node X and one of its child nodes Y, then 75% of the proteins on  
250 the branches that subtend node Y must contain a predicted chloroplast transit peptide for it to be  
251 considered for further analysis. Similarly, for the other child node Z, 75% of the genes that subtend that  
252 must not contain a chloroplast transit peptide. Only if both these criteria are met is a change in  
253 subcellular localisation assigned to the branch within the orthogroup tree between node X and node Y.  
254 In all cases, it was required that two or more sequences must subtend any branch under consideration.

255 This requirement was imposed so that inference about the predicted subcellular targeting state of an  
256 ancestral protein was informed by the subcellular targeting state of two or more extant genes. This  
257 requirement improves robustness to subcellular prediction targeting error and means that changes in  
258 subcellular localisation was not evaluated for terminal branches in orthogroup trees. This filtered dataset  
259 was used in all subsequent analyses.

260 Given that each orthogroup tree was reconciled with the species tree, the complete set of changes in  
261 all orthogroup trees could be assigned to the corresponding branches on the species tree. Thus the  
262 number of gains and losses in protein targeting to each of the four organelles could be quantified for  
263 each branch of the species tree.

264 To estimate the average rate at which proteins have gained or lost organelle target signals during the  
265 evolution of land plants 10 nodes were selected on the tree for which a divergence time is known. The  
266 number of gains and losses in targeting to each organelle was then summed for the branches between  
267 the node at the base of the land plants (taken as 450mya<sup>28</sup>) and the nodes with known divergence time,  
268 thus allowing the number of changes per million years to be calculated (Supplementary File S2).

### 269 **Identification of changes following gene duplication and speciation events**

270 To investigate whether changes in subcellular targeting occur more frequently following gene duplication  
271 events or speciation events it was necessary to identify whether each node in each orthogroup tree  
272 comprised either a gene duplication event or a speciation event. To prevent tree inference error from  
273 influencing the results, a stringent filter was applied to the orthogroup trees to enable identification of  
274 both high confidence gene duplication nodes and high confidence speciation nodes. High confidence  
275 gene duplication nodes were defined as nodes for which the gene duplication event was retained in all  
276 descendant species of both child nodes subtending the gene duplication event. Similarly a high  
277 confidence speciation node was selected as a node which has no evidence for gene duplication and  
278 from which there was no subsequent gene loss in any of the descendant species. In both cases,  
279 (duplication and speciation nodes) complete retention of all genes in all descendant species is required  
280 and thus the gene sets can be considered broadly equivalent.

281 To determine whether changes in subcellular localisation were more likely to occur following gene  
282 duplication events than speciation events, the occurrence of changes in subcellular localisation following  
283 duplication or speciation nodes was analyzed.

#### 284 **Functional term enrichment analysis**

285 Orthogroups were assigned MapMan terms and sub-chloroplast localisation terms (plant protein  
286 database PPDB) by inheriting the terms associated with the genes found within them. MapMan terms  
287 were taken from the GoMapMan webpage<sup>29</sup> and sub-chloroplast terms assigned using the hierarchical  
288 structure provided on the PPDB<sup>30</sup> using only experimentally validated proteins (see Supplementary File  
289 S4 for the PPDB list used at time of writing). To test for enrichment the hypergeometric test was  
290 performed and p-values corrected for multiple testing using the Benjamini-Hochberg correction (see  
291 Supplementary File S3 for MapMan results and S4 for PPDB). The aim was to identify functional  
292 enrichment among orthogroups whose proteins are differentially localized. To avoid simply identifying  
293 functional terms that are enriched in organelle targeted gene families, the background sample for this  
294 test was orthogroups with at least one predicted organelle targeted protein. Significantly enriched  
295 functional annotation terms were those with a corrected p-value of  $\leq 0.01$ .

296 **Figures**

297 **Figure 1**

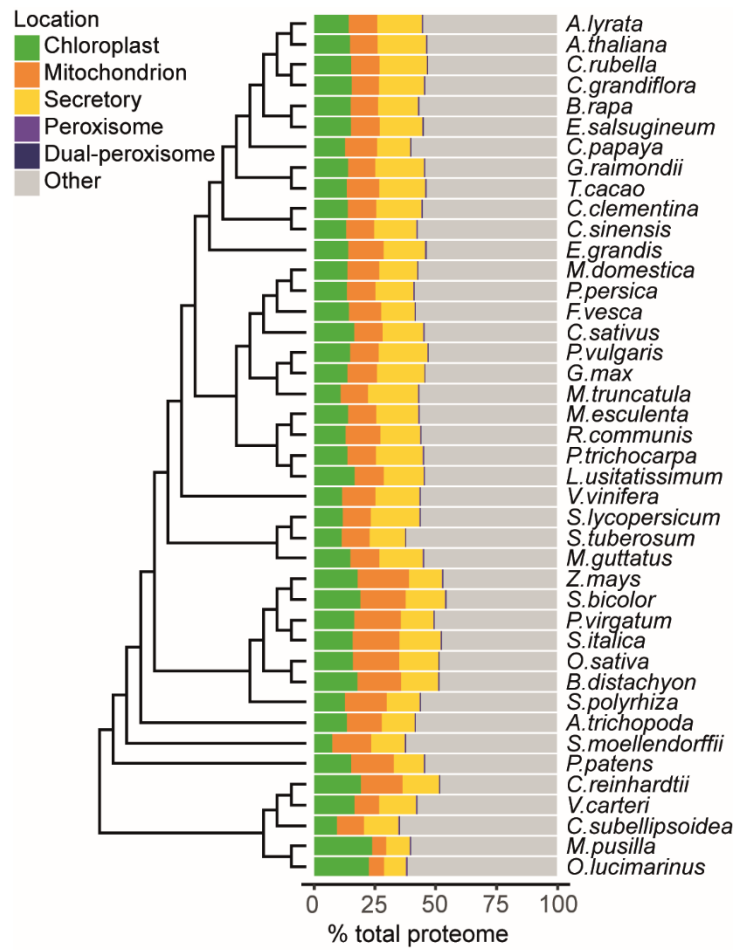

298

299

300 **Figure 2**

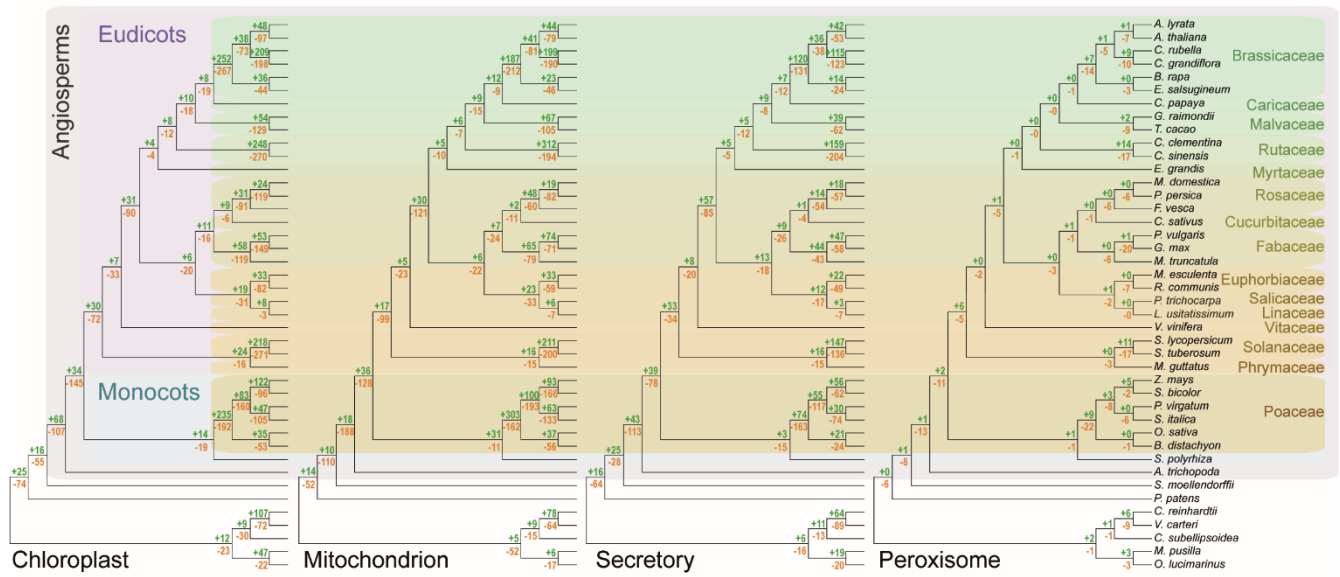

301

302

303 **Figure 3**

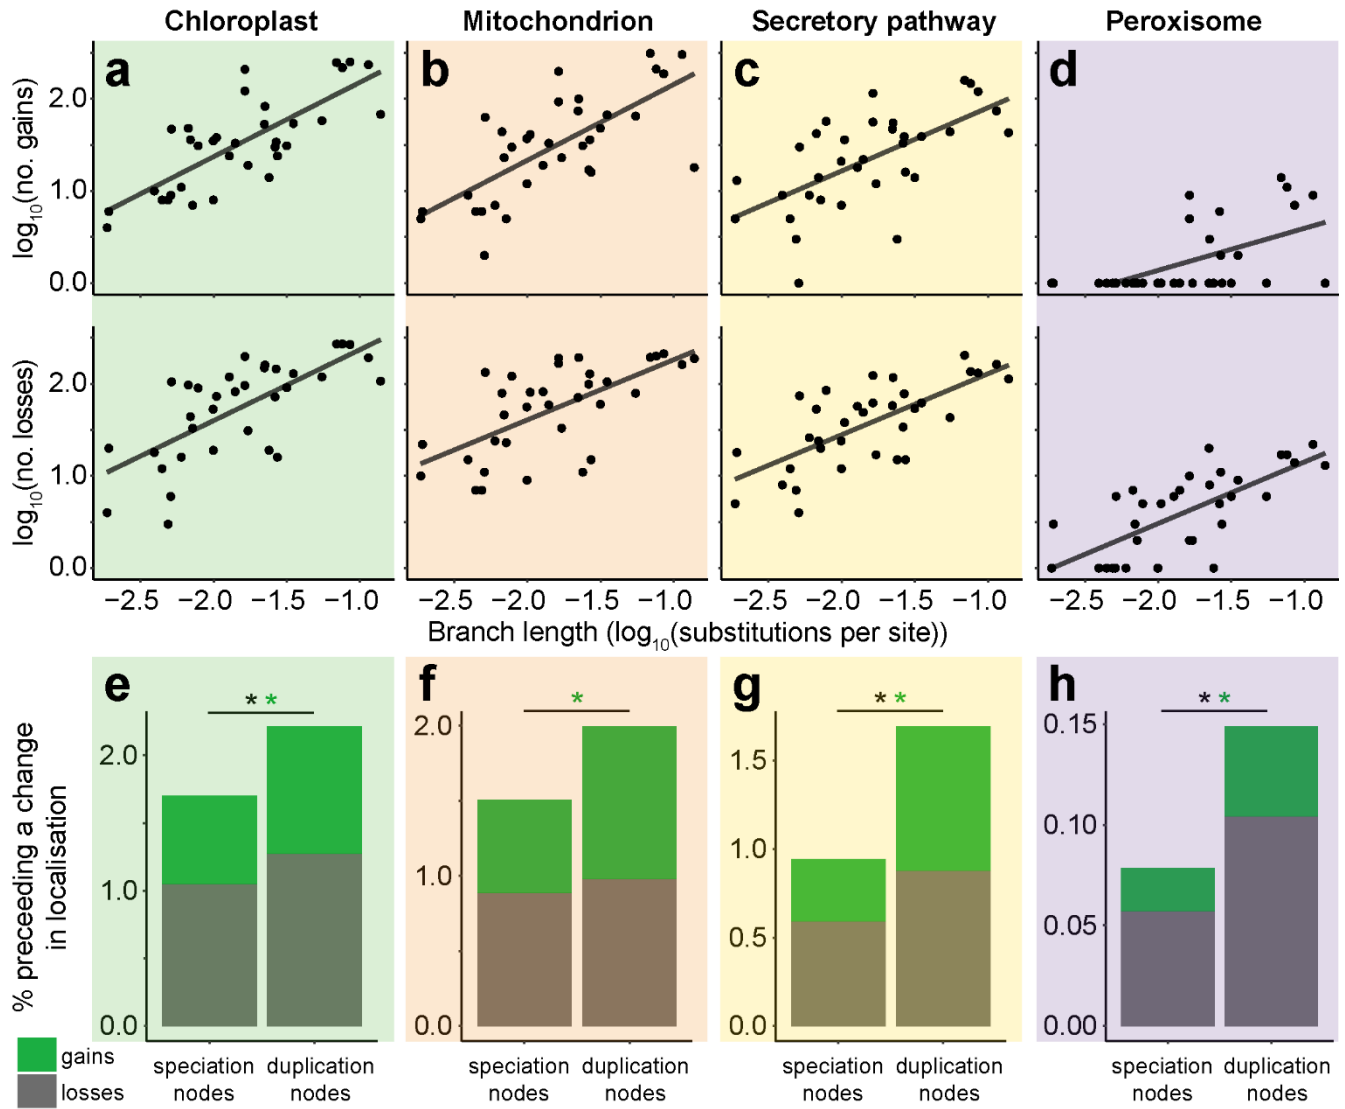

304

305

306 **Figure 4**

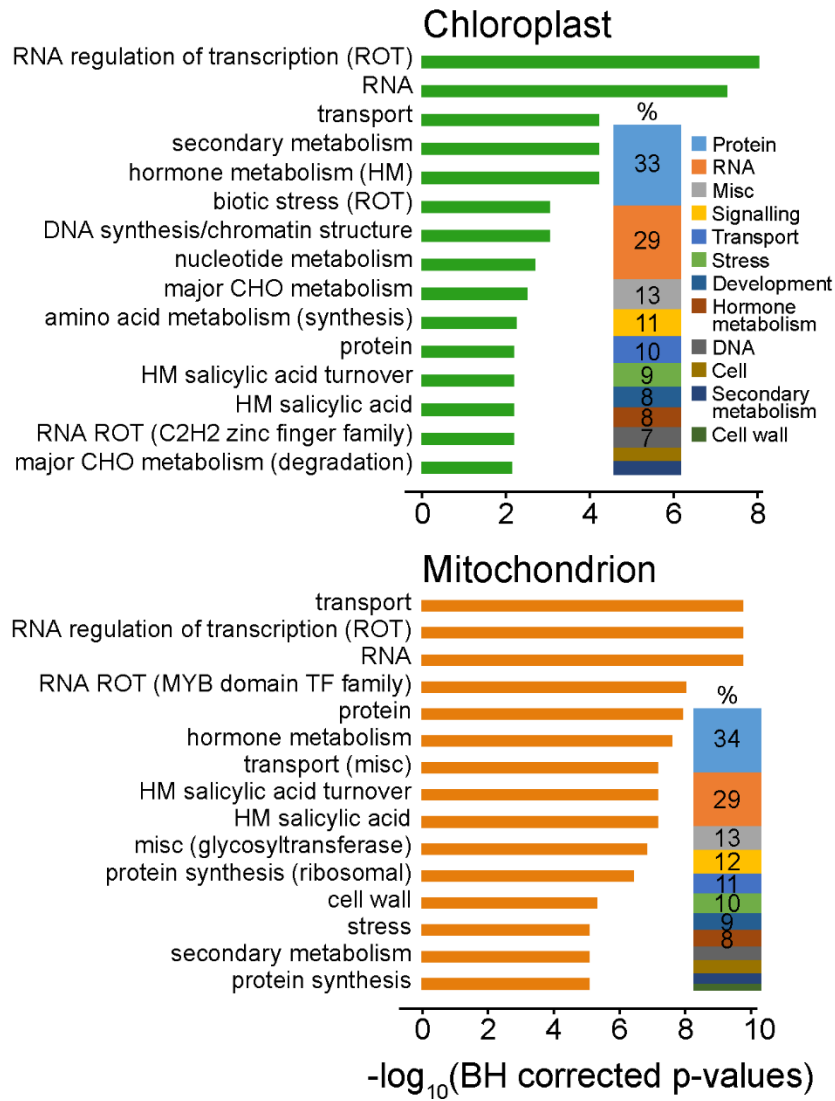

307

308



## 309 **References**

- 310 1. Timmis, J. N., Ayliffe, M. A., Huang, C. Y. & Martin, W. Endosymbiotic gene transfer: organelle  
311 genomes forge eukaryotic chromosomes. *Nat. Rev. Genet.* **5**, 123–135 (2004).
- 312 2. Schatz, G. & Dobberstein, B. Common Principles of Protein Translocation Across Membranes.  
313 *Science (80-. )*. **271**, 1519–1526 (1996).
- 314 3. Kunze, M. & Berger, J. The similarity between N-terminal targeting signals for protein import into  
315 different organelles and its evolutionary relevance. *Front. Physiol.* **6**, 259 (2015).
- 316 4. Bannai, H., Tamada, Y., Maruyama, O., Nakai, K. & Miyano, S. Extensive feature detection of N-  
317 terminal protein sorting signals. *Bioinformatics* (2002). doi:10.1093/bioinformatics/18.2.298
- 318 5. NORDLIE, R. C. & LARDY, H. A. Mammalian liver phosphoenolpyruvate carboxykinase activities.  
319 *J. Biol. Chem.* (1963).
- 320 6. Schnarrenberger, C., Herbert, M. & Kruger, I. Intracellular compartmentation of isozymes of sugar  
321 phosphate metabolism in green leaves. *Isozymes Curr Top Biol Med Res* (1983).
- 322 7. Marques, A. C., Vinckenbosch, N., Brawand, D. & Kaessmann, H. Functional diversification of  
323 duplicate genes through subcellular adaptation of encoded proteins. *Genome Biol.* **9**, 1–12  
324 (2008).
- 325 8. Qian, W. & Zhang, J. Protein Subcellular Relocalization in the Evolution of Yeast Singleton and  
326 Duplicate Genes. *Genome Biol. Evol.* **1**, 198–204 (2010).
- 327 9. Wang, X., Huang, Y., Lavrov, D. V. & Gu, X. Comparative study of human mitochondrial proteome  
328 reveals extensive protein subcellular relocalization after gene duplications. *BMC Evol. Biol.* **9**,  
329 (2009).
- 330 10. Liu, S.-L., Pan, A. Q. & Adams, K. L. Protein Subcellular Relocalization of Duplicated Genes in  
331 Arabidopsis. *Genome Biol. Evol.* **6**, 2501–2515 (2014).
- 332 11. Ren, L.-L. *et al.* Subcellular Relocalization and Positive Selection Play Key Roles in the Retention  
333 of Duplicate Genes of Populus Class III Peroxidase Family. *Plant Cell* **26**, 2404–2419 (2014).

- 334 12. Heilmann, I., Pidkowich, M. S., Girke, T. & Shanklin, J. Switching desaturase enzyme specificity  
335 by alternate subcellular targeting. *Proc. Natl. Acad. Sci. U. S. A.* **101**, 10266–10271 (2004).
- 336 13. Goodstein, D. M. *et al.* Phytozome: A comparative platform for green plant genomics. *Nucleic  
337 Acids Res.* **40**, D1178–D1186 (2012).
- 338 14. Emanuelsson, O., Nielsen, H., Brunak, S. & von Heijne, G. Predicting Subcellular Localization of  
339 Proteins Based on their N-terminal Amino Acid Sequence. *J. Mol. Biol.* **300**, 1005–1016 (2000).
- 340 15. Tardif, M. *et al.* Predalgo: A new subcellular localization prediction tool dedicated to green algae.  
341 in *Molecular Biology and Evolution* **29**, 3625–3639 (2012).
- 342 16. Hönigschmid, P., Bykova, N., Schneider, R., Ivankov, D. & Frishman, D. Evolutionary Interplay  
343 between Symbiotic Relationships and Patterns of Signal Peptide Gain and Loss. *Genome Biol.  
344 Evol.* **10**, 928–938 (2018).
- 345 17. Byun-McKay, S. A. & Geeta, R. Protein subcellular relocalization: a new perspective on the origin  
346 of novel genes. *Trends Ecol. Evol.* **22**, 338–344 (2007).
- 347 18. McKay, S. A. B., Geeta, R., Duggan, R., Carroll, B. & McKay, S. J. Missing the Subcellular Target:  
348 A Mechanism of Eukaryotic Gene Evolution. in *Evolutionary Biology: Concept, Modeling, and  
349 Application* (ed. Pontarotti, P.) 175–183 (Springer Berlin Heidelberg, 2009). doi:10.1007/978-3-  
350 642-00952-5\_10
- 351 19. Byun, S. A. & Singh, S. Protein subcellular relocalization increases the retention of eukaryotic  
352 duplicate genes. *Genome Biol. Evol.* **5**, 2402–2409 (2013).
- 353 20. Emms, D. M. & Kelly, S. OrthoFinder: solving fundamental biases in whole genome comparisons  
354 dramatically improves orthogroup inference accuracy. *Genome Biol.* **16**, 157 (2015).
- 355 21. Katoh, K. & Standley, D. M. MAFFT multiple sequence alignment software version 7:  
356 Improvements in performance and usability. *Mol. Biol. Evol.* **30**, 772–780 (2013).
- 357 22. Boussau, B. *et al.* Genome-scale coestimation of species and gene trees. *Genome Res.* **23**, 323–  
358 330 (2013).

- 359 23. Stamatakis, A. RAxML version 8: A tool for phylogenetic analysis and post-analysis of large  
360 phylogenies. *Bioinformatics* (2014). doi:10.1093/bioinformatics/btu033
- 361 24. Price, M. N., Dehal, P. S. & Arkin, A. P. FastTree 2 - Approximately maximum-likelihood trees for  
362 large alignments. *PLoS One* **5**, (2010).
- 363 25. Wu, Y. C., Rasmussen, M. D., Bansal, M. S. & Kellis, M. Most parsimonious reconciliation in the  
364 presence of gene duplication, loss, and deep coalescence using labeled coalescent trees.  
365 *Genome Res.* (2014). doi:10.1101/gr.161968.113
- 366 26. Reumann, S. Specification of the Peroxisome Targeting Signals Type 1 and Type 2 of Plant  
367 Peroxisomes by Bioinformatics Analyses. *PLANT Physiol.* **135**, 783–800 (2004).
- 368 27. Paradis, E., Claude, J. & Strimmer, K. APE: Analyses of phylogenetics and evolution in R  
369 language. *Bioinformatics* **20**, 289–290 (2004).
- 370 28. Morris, J. L. *et al.* The timescale of early land plant evolution. *Proc. Natl. Acad. Sci.* 201719588  
371 (2018). doi:10.1073/pnas.1719588115
- 372 29. Ramšak, Ž. *et al.* GoMapMan: Integration, consolidation and visualization of plant gene  
373 annotations within the MapMan ontology. *Nucleic Acids Res.* **42**, (2014).
- 374 30. Sun, Q. *et al.* PPDB, the Plant Proteomics Database at Cornell. *Nucleic Acids Res.* **37**, (2009).  
375
